# Supplementary material
Source: Copernicus journal article supplement (doi:10.5194/egusphere-2026-1341)
Supplement: Supplementary file 1 [file egusphere-2026-1341-supplement.pdf]

Supplement of “Combining different views on internal climate variability of temperature over Europe”

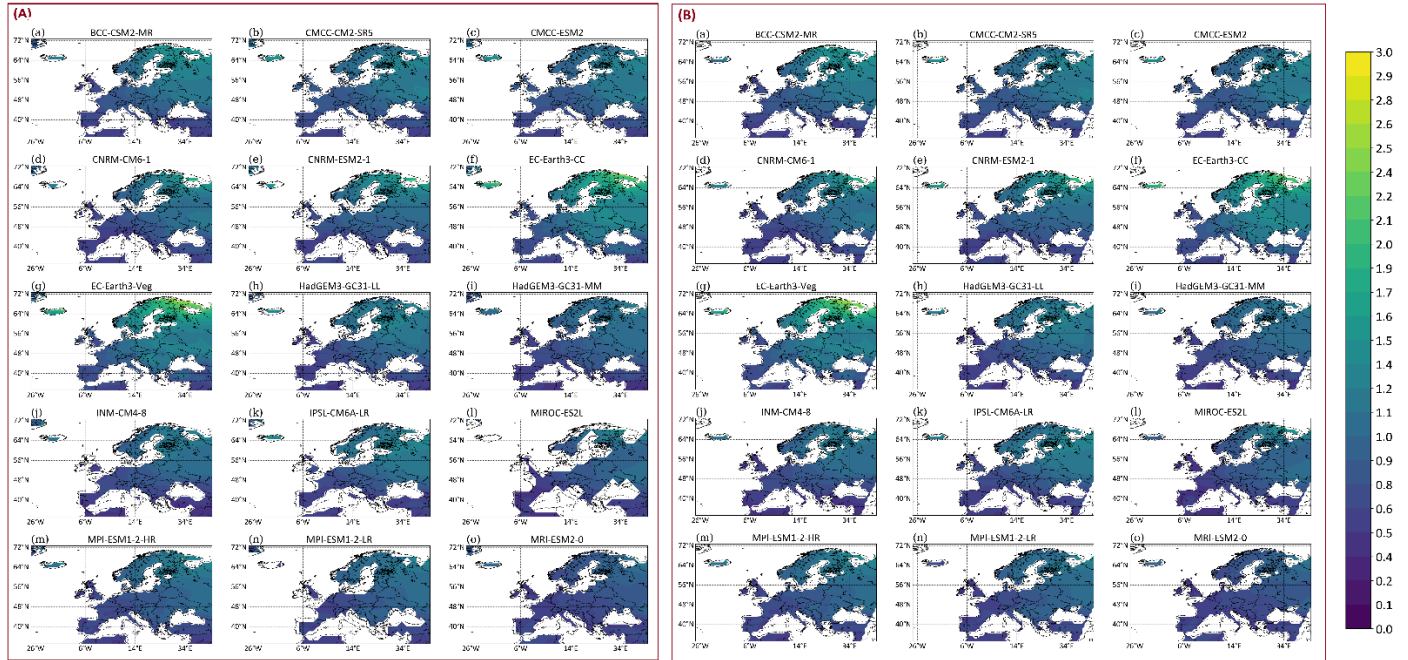

Figure S1: Yearly standard deviation from 15 CMIP6 models. Original grids (A) vs Regridded ones (B).

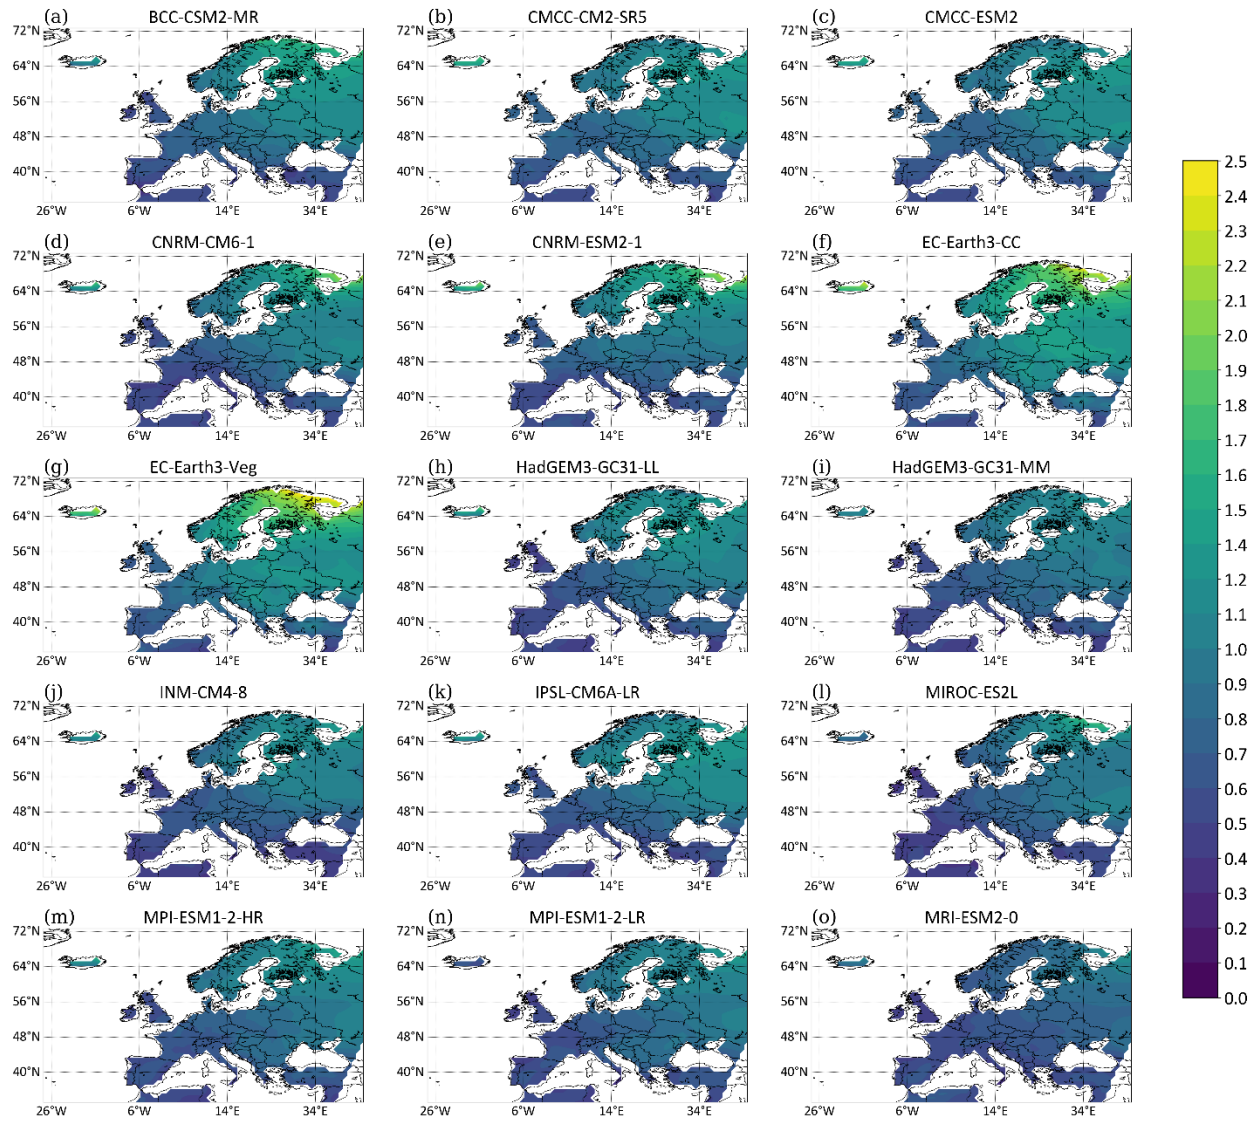

Figure S2: Yearly ICV estimates from each of the model of Pidata

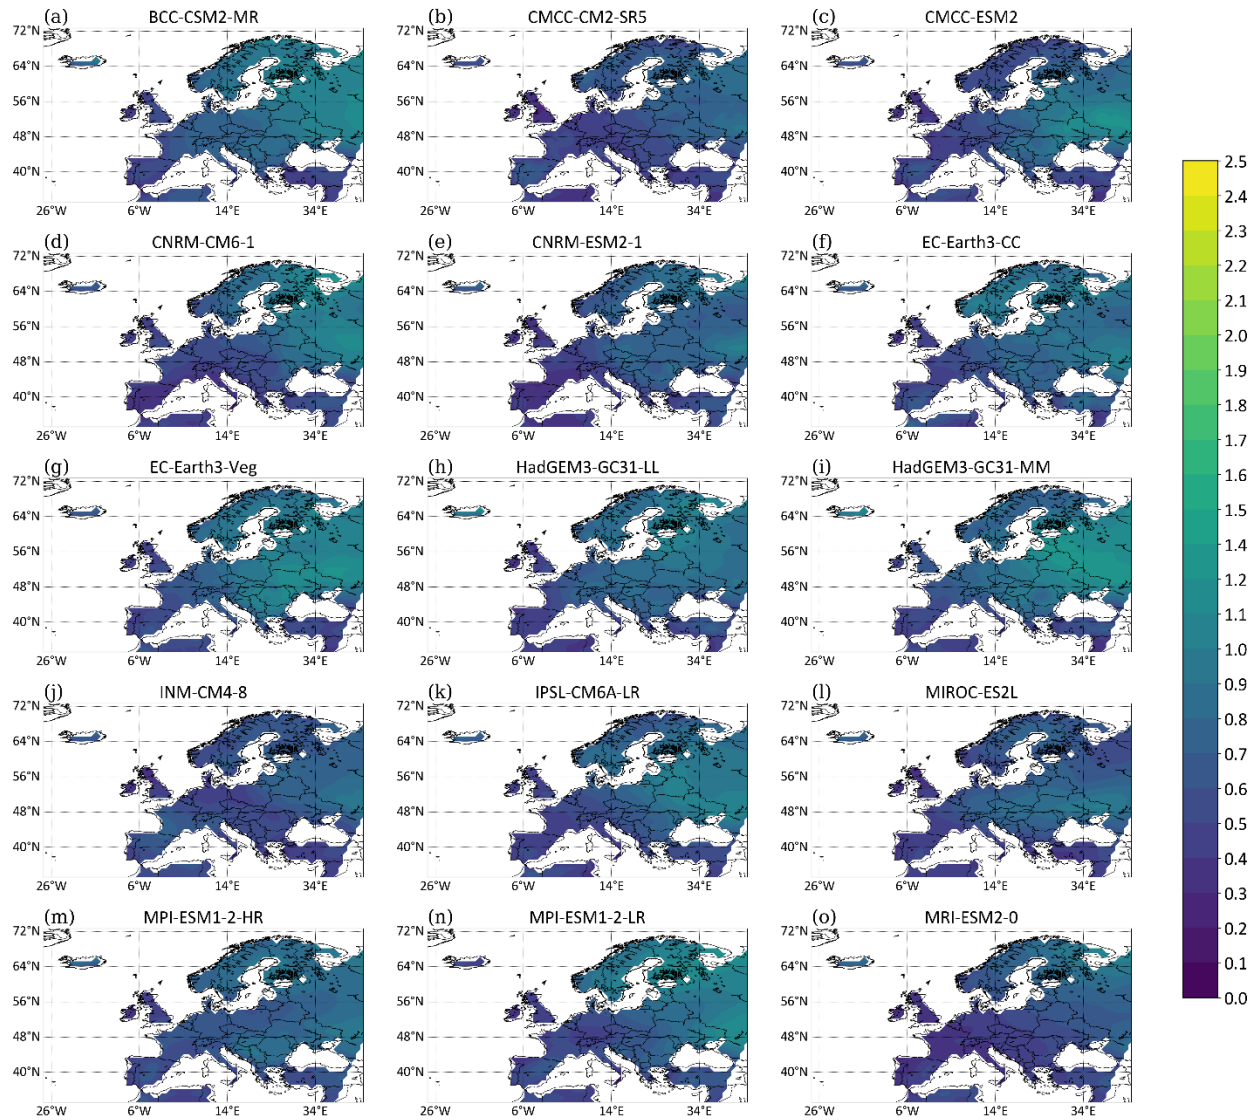

Figure S3: Yearly ICV estimates based on HS2009 method from each model of CMIP6 simulation during the historical simulation (1971-2000).

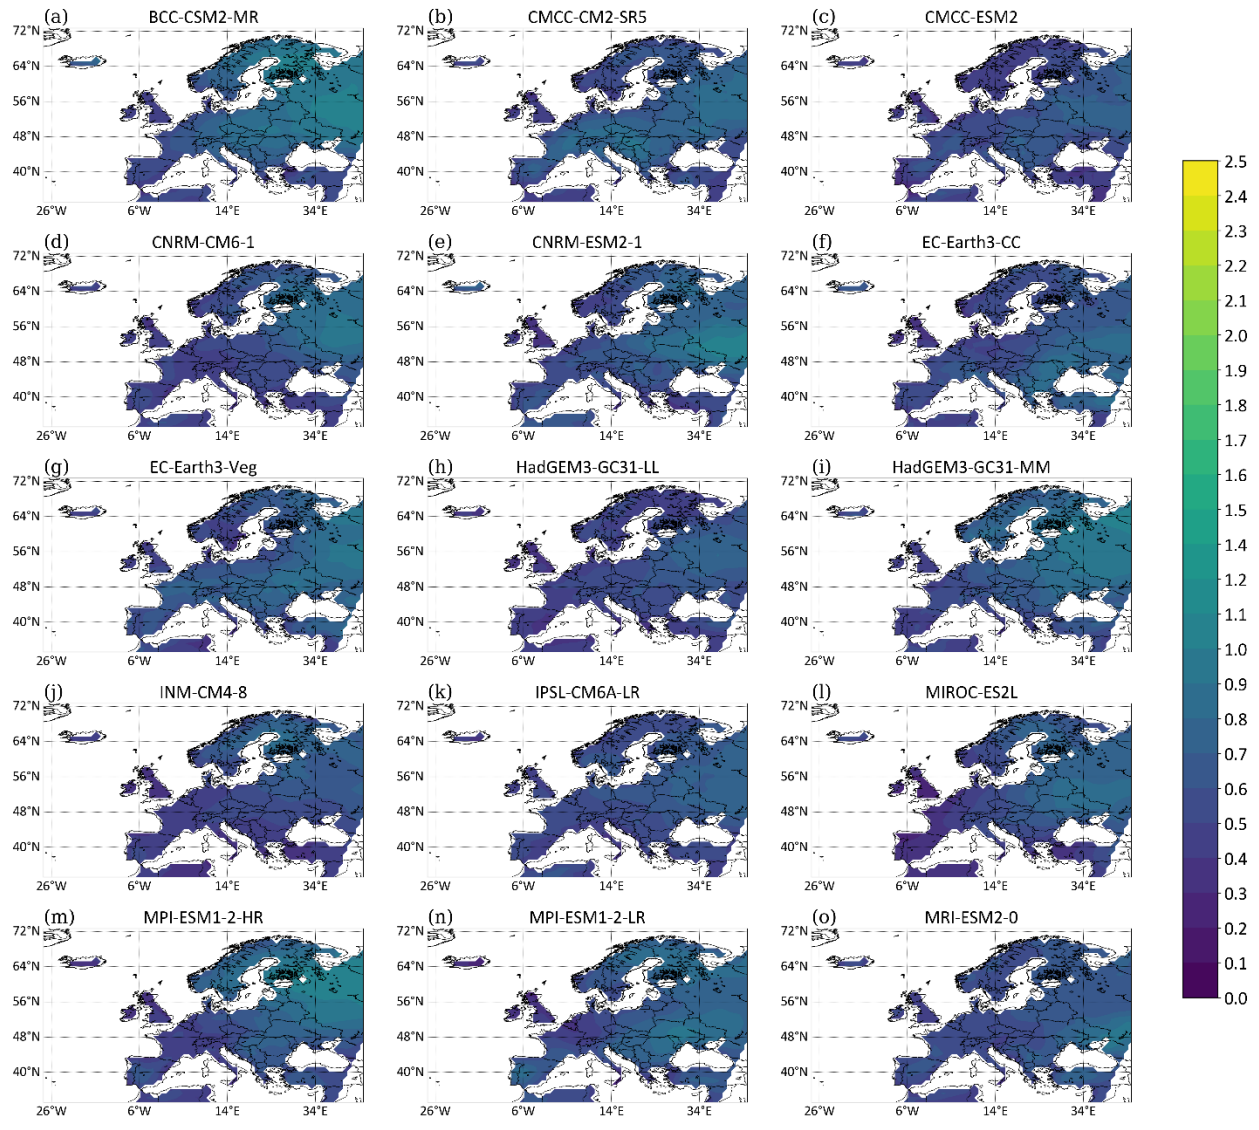

Figure S4: Same as Fig.S3 but for the period 2070-2099

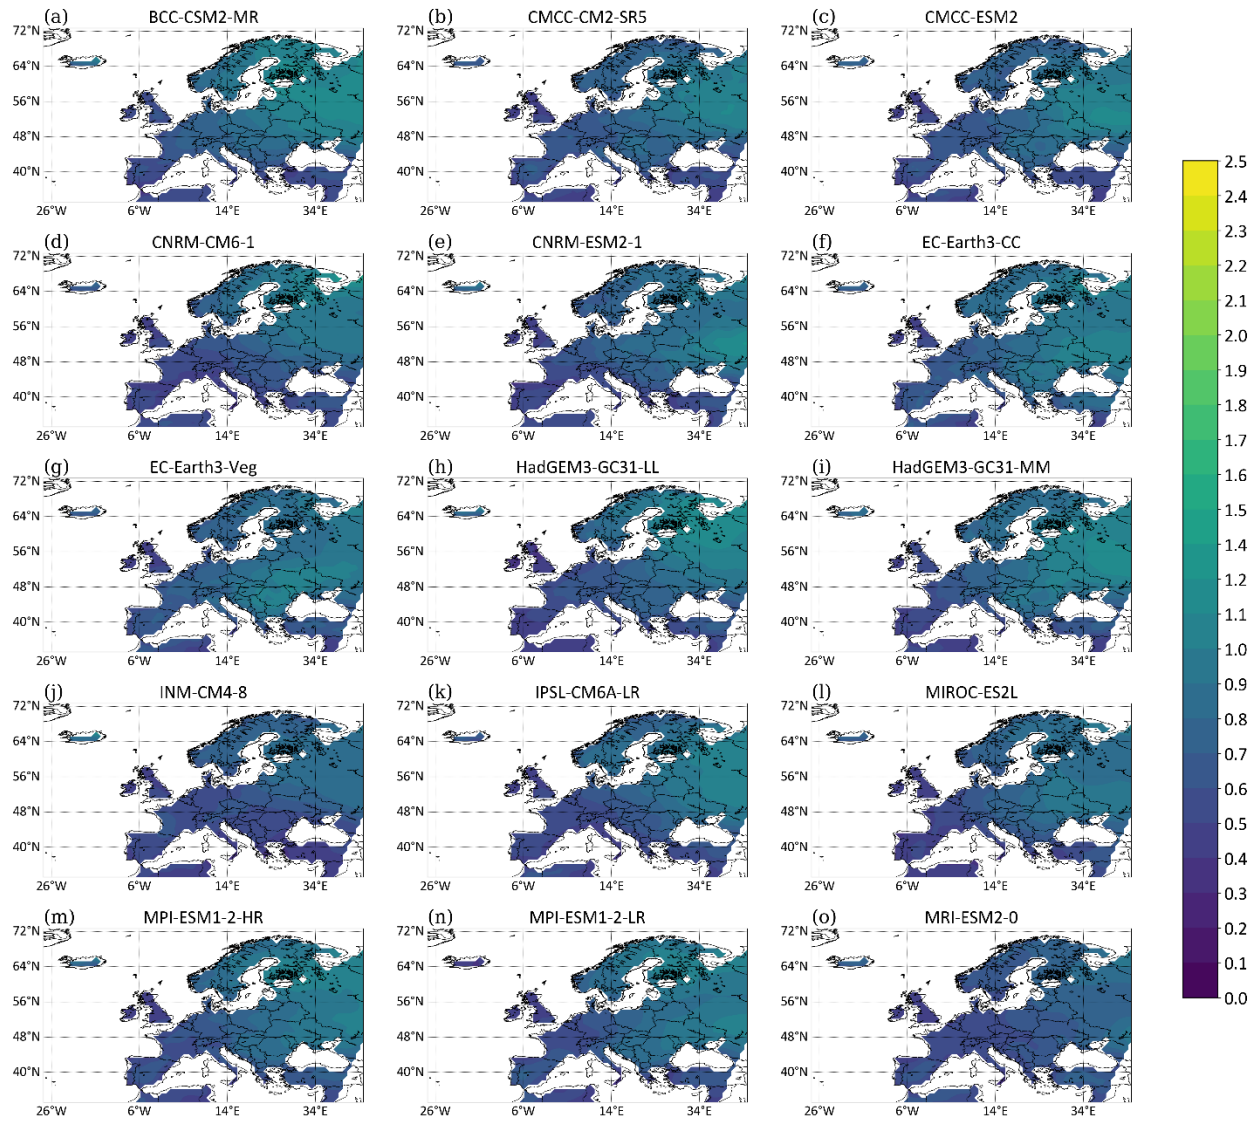

Figure S5: Same as Fig.S3 but for the period 1971-2100.
